# Supplementary material
Source: Springer Nature journal article supplement (https://www.springermedizin.de/resource/supplementary/12889_2014_6746_MOESM1_ESM.pdf/9498946)
Supplement: MOESM1 [file 9498946]

Form No: A Study ID: E 

|  |  |  |  |  |  |  |  |
|--|--|--|--|--|--|--|--|
|  |  |  |  |  |  |  |  |
|--|--|--|--|--|--|--|--|

  
Page 1 of 1 Initials: 

|  |  |  |
|--|--|--|
|  |  |  |
|--|--|--|

**Confidential: Information on Form A should not be entered into the main database**  
**SRI LANKA DIABETES AND CARDIOVASCULAR DISEASES STUDY .**  
**(SLDCS)**  
**Questionnaire**

**Contact Details (Please print in block capitals)**

Title: Mr/Miss/Mrs/Dr/Rev (delete not applicable)

Surname with initials: .....  
(Eg: Ranasinghe L.M.S)

Other Names: .....  
.....

Initials (upto three): 

|  |  |  |
|--|--|--|
|  |  |  |
|--|--|--|

 (Eg. L. M. S.)  
( when there are more than three initials always take first three)  
(When there are less than three take the first letter of the surname as the last initial)

**Permanent Address:**

No .....  
Street .....  
City .....  
  
Tel No (Res): .....  
Tel No (Off): .....  
Mobile No: .....  
Email: .....

**Corresponding address (if different from above)**

No .....  
Street .....  
City .....  
  
Tel No (Res): .....  
Tel No (Off): .....  
Mobile No: .....  
Email: .....

**Measure blood pressure - 1st reading**

**HISTORY**

**Date of interview** : .....  
**District** : .....  
**District code:** (refer to appendix 1 to get the district code) [ ] [ ]  
**Cluster name** : .....  
**Cluster number:** (refer to appendix 2 to get the cluster number) [ ] [ ] [ ]  
**Sector**

- : Rural 1
- Urban 2
- Estates 3

**Sector (Subjective)** : Rural 1  
 Urban 2  
 Estates 3

**Date of birth :**

**Age :** ( calculate later )

**Sex :** Male 1  
 Female 2

**Ethnicity :** 1 Sinhalese  
 2 Sri lankan Tamil  
 3 Indian Tamil  
 4 Muslim  
 5 Burger  
 6 Other

**Marital Status :** 1 Unmarried  
 2 Married  
 3 Divorced  
 4 Widowed  
 5 Seperated

**Fasting Status**

Time at your last meal or drink ( except water):  
 (24 hour clock)

Time at which your blood sample was taken:  
 (24 hour clock)

**Socio-Economic Factors**

Highest educational level achieved:

- 1 No formal education
- 2 Grade 1-5
- 3 Grade 6-11
- 4 Qualified GCE (O/L)
- 5 Qualified GCE (A/L)
- 6 Graduate/Diploma
- 7 Postgraduate
- 8 Other

| dd      | mm      | yyyy            |
|---------|---------|-----------------|
| [ ] [ ] | [ ] [ ] | [ ] [ ] [ ] [ ] |

(1)

|         |
|---------|
| [ ] [ ] |
|---------|

(2)

| Cluster No  |
|-------------|
| [ ] [ ] [ ] |

(3)

| Sector |
|--------|
| 1      |
| 2      |
| 3      |

(4)

|   |
|---|
| 1 |
| 2 |
| 3 |

(5)

| dd      | mm      | yyyy            |
|---------|---------|-----------------|
| [ ] [ ] | [ ] [ ] | [ ] [ ] [ ] [ ] |

(6)

| months  | years   |
|---------|---------|
| [ ] [ ] | [ ] [ ] |

(7)

**Circle the correct response**

|   |
|---|
| 1 |
| 2 |

(8)

|   |
|---|
| 1 |
| 2 |
| 3 |
| 4 |
| 5 |
| 6 |

(9)

|   |
|---|
| 1 |
| 2 |
| 3 |
| 4 |
| 5 |

(10)

| Hour    | e       |
|---------|---------|
| [ ] [ ] | [ ] [ ] |

(11)

| Hour    | e       |
|---------|---------|
| [ ] [ ] | [ ] [ ] |

(12)

**Circle the correct response**

|   |
|---|
| 1 |
| 2 |
| 3 |
| 4 |
| 5 |
| 6 |
| 7 |
| 8 |

(13)

**Your present occupation:(If in doubt refer to annexure 2)**

- 1 Senior Officials and Managers
- 2 Professionals
- 3 Technical and Associate Professionals
- 4 Clerks
- 5 Sales and Service workers
- 6 Skilled agricultural and Fishary worker
- 7 Craft and Related trades workers
- 8 Plant and machine operators and assemblers
- 9 Elementary occupations
- 10 Armed Forces
- 11 Unemployed
- 12 Other (specify).....

Circle the correct response

- 1
- 2
- 3
- 4
- 5 (14)
- 6
- 7
- 8
- 9
- 10
- 11
- 12

**Duration of present occupation:**

years      months  
         (15)

**Sector of the place of employment**

- 1 Rural
- 2 Urban

- 1 (16)
- 2

**Monthly family income**

- 1 Less than Rs 6999
- 2 Rs 7000- 12999
- 3 Rs 13000- 24999
- 4 Rs 25000- 49999
- 5 More than Rs 50000

Circle the correct response

- 1
- 2
- 3 (17)
- 4
- 5

**Foreign stay**

- 1 Yes
- 2 No

- 1 (18)
- 2

**Duration (Months)**

(19)

**Smoking**

- 1 Never
- 2 Ex-smoker ( not for last >6 months )
- 3 1 or <1 per day
- 4 Currently <10 per a day
- 5 Currently 10 - 20 per a day
- 6 Currently >20 per a day

Circle the correct response

- 1
- 2
- 3 (20)
- 4
- 5
- 6

**Alcohol- quantity (Refer to annexure 3)**

How much (units of alcohol) do you drink per week on average?

- 1 Nil
- 2 Ex-drinker ( not for last >6 months)
- 3 < or = 3 per week
- 4 4-7 per day
- 5 7-14 per week
- 6 15-21 per week
- 7 22 -35 per week
- 8 >36 per week

Circle the correct response

- 1
- 2
- 3 (21)
- 4
- 5
- 6
- 7
- 8

**Physical Activity Level - IPAQ score (Refer to annexure 4)**

**Do you engage in vigorous physical activities ?**

( for occupation, exercise/sports, leisure) -- please underlying the activity  
 eg: carrying heavy weights fast cycling swimming digging the earth  
 heavy construction work running aerobics chopping wood  
 heavy manual labour exercise in a gym etc

Circle the correct response

|            |           |      |
|------------|-----------|------|
| <b>yes</b> | <b>no</b> |      |
| 1          | 0         | (22) |

**If yes,**

Number of days of vigorous activities per week?

|                      |      |
|----------------------|------|
| <input type="text"/> | (23) |
|----------------------|------|

Average minutes per day of vigorous activities?

|                                                                |          |
|----------------------------------------------------------------|----------|
| <input type="text"/> <input type="text"/> <input type="text"/> | min (24) |
|----------------------------------------------------------------|----------|

**Met/Min per week by vigorous physical activities?**

(Met/Min = 8 \* mins of vigorous activities \* days per week)

|                                                                                     |              |
|-------------------------------------------------------------------------------------|--------------|
| <input type="text"/> <input type="text"/> <input type="text"/> <input type="text"/> | Met/Min (25) |
|-------------------------------------------------------------------------------------|--------------|

**Do you engage in moderate physical activities ?**

( for occupation, exercise/sports, leisure) -- please underlying the activity  
 eg: carrying light weights slow cycling washing  
 sweeping the garden and house scrubbing the floor

Circle the correct response

|            |           |      |
|------------|-----------|------|
| <b>yes</b> | <b>no</b> |      |
| 1          | 0         | (26) |

**If yes,**

Number of days of moderate activities per week?

|                      |      |
|----------------------|------|
| <input type="text"/> | (27) |
|----------------------|------|

Average minutes per day of moderate activities?

|                                                                |          |
|----------------------------------------------------------------|----------|
| <input type="text"/> <input type="text"/> <input type="text"/> | min (28) |
|----------------------------------------------------------------|----------|

**Met/Min per week by moderate physical activities?**

(Met/Min = 4 \* mins of moderate activities \* days per week)

|                                                                                     |              |
|-------------------------------------------------------------------------------------|--------------|
| <input type="text"/> <input type="text"/> <input type="text"/> <input type="text"/> | Met/Min (29) |
|-------------------------------------------------------------------------------------|--------------|

**Do you walk more than 10 mins per day at a stretch ?**

( for occupation, exercise/sports, leisure)

Circle the correct response

|            |           |      |
|------------|-----------|------|
| <b>yes</b> | <b>no</b> |      |
| 1          | 0         | (30) |

**If yes,**

Number of days of walking per week?

|                      |      |
|----------------------|------|
| <input type="text"/> | (31) |
|----------------------|------|

Average minutes per day of walking?

|                                                                |          |
|----------------------------------------------------------------|----------|
| <input type="text"/> <input type="text"/> <input type="text"/> | min (32) |
|----------------------------------------------------------------|----------|

**Met/Min per week by walking?**

(Met/Min = 3.3 \* mins of walking \* days per week)

|                                                                                     |              |
|-------------------------------------------------------------------------------------|--------------|
| <input type="text"/> <input type="text"/> <input type="text"/> <input type="text"/> | Met/Min (33) |
|-------------------------------------------------------------------------------------|--------------|

**Physical activity level: ( calculate later )**

- 1 Insufficiently active ( sedentary)
- 2 Moderately active
- 3 HEPA active

Circle the correct response

|   |      |
|---|------|
| 1 |      |
| 2 | (34) |
| 3 |      |

**Do you have following symptoms?**

- Polyuria.....
- Nocturia.....
- Thirst.....
- Weight loss.....
- Wound infection.....
- Cellulitis and abscess.....
- Balanitis.....
- Giddiness.....
- Sleepiness.....
- Blurring of vision.....

|            |           |      |
|------------|-----------|------|
| <b>Yes</b> | <b>No</b> |      |
| 1          | 0         | (35) |
| 1          | 0         | (36) |
| 1          | 0         | (37) |
| 1          | 0         | (38) |
| 1          | 0         | (39) |
| 1          | 0         | (40) |
| 1          | 0         | (41) |
| 1          | 0         | (42) |
| 1          | 0         | (43) |
| 1          | 0         | (44) |

*Ask only from females***History of gestational diabetes:**

|            |           |      |
|------------|-----------|------|
| <b>Yes</b> | <b>No</b> |      |
| 1          | 0         | (45) |

**Have you delivered a baby with birth weight > 4 kg ( 9lbs )?**

|            |           |      |
|------------|-----------|------|
| <b>Yes</b> | <b>No</b> |      |
| 1          | 0         | (46) |

*Ask only from females - History of..*

subfertility

|            |            |           |      |
|------------|------------|-----------|------|
| <b>Yes</b> | <b>N/A</b> | <b>No</b> |      |
| 1          | 2          | 0         | (47) |

amenorrhoea/oligomenorrhoea

|   |   |   |      |
|---|---|---|------|
| 1 | 2 | 0 | (48) |
|---|---|---|------|

Diagnosis of polycystic ovarian disease

|   |   |   |      |
|---|---|---|------|
| 1 | 2 | 0 | (49) |
|---|---|---|------|

**Steroids therapy during the last year**

|            |           |      |
|------------|-----------|------|
| <b>Yes</b> | <b>No</b> |      |
| 1          | 0         | (50) |

**If yes,****mode of therapy**

Systemic

inhaled

Skin

Other topical forms

Circle the correct response

1

2

3

4

(51)

mm | yy

|  |  |  |  |
|--|--|--|--|
|  |  |  |  |
|--|--|--|--|

(52)

**duration**

Months/years

**Have you ever been told by a doctor that you are suffering from any of the conditions stated below?**

( clarify with the diagnosis card if available)

Definite-D

May present - M

Absent-A

**D M A**

Hypertension.....

|   |   |   |      |
|---|---|---|------|
| 1 | 2 | 0 | (53) |
|---|---|---|------|

Ischaemic Heart Diseases.....

|   |   |   |      |
|---|---|---|------|
| 1 | 2 | 0 | (54) |
|---|---|---|------|

Cerebrovascular Disease.....

|   |   |   |      |
|---|---|---|------|
| 1 | 2 | 0 | (55) |
|---|---|---|------|

Peripheral vascular disease.....

|   |   |   |      |
|---|---|---|------|
| 1 | 2 | 0 | (56) |
|---|---|---|------|

Hyperlipidaemia.....

|   |   |   |      |
|---|---|---|------|
| 1 | 2 | 0 | (57) |
|---|---|---|------|

Obesity.....

|   |   |   |      |
|---|---|---|------|
| 1 | 2 | 0 | (58) |
|---|---|---|------|

Pancreatic disease.....

|   |   |   |      |
|---|---|---|------|
| 1 | 2 | 0 | (59) |
|---|---|---|------|

Autoimmune diseases :

(adissons, hypothyroidism, hypoparathyroidism,

alopecia areata, vitiligo)

|   |   |   |      |
|---|---|---|------|
| 1 | 2 | 0 | (60) |
|---|---|---|------|

Other (specify) 1 .....

|  |  |  |      |
|--|--|--|------|
|  |  |  | (61) |
|--|--|--|------|

2 .....

|  |  |  |      |
|--|--|--|------|
|  |  |  | (62) |
|--|--|--|------|

**Cardiovascular Symptoms**

|            |           |      |
|------------|-----------|------|
| <b>Yes</b> | <b>No</b> |      |
| 1          | 0         | (63) |

\* Have you ever had any pain or discomfort or any pressure or heaviness in your chest?

|   |   |      |
|---|---|------|
| 1 | 0 | (64) |
|---|---|------|

\* Do you get the pain in the centre of the chest or left arm?

|   |   |      |
|---|---|------|
| 1 | 0 | (65) |
|---|---|------|

\* Do you get it when you walk at an ordinary pace on level or when walk uphill or hurry?

|   |   |      |
|---|---|------|
| 1 | 0 | (66) |
|---|---|------|

\* Do you slow down if you get the pain while walking?

|   |   |      |
|---|---|------|
| 1 | 0 | (67) |
|---|---|------|

\* Does the pain go away if you stand still or if you take a tablet under the tongue?

|   |   |      |
|---|---|------|
| 1 | 0 | (68) |
|---|---|------|

\* Does the pain go away in less than 10 minutes?

|   |   |      |
|---|---|------|
| 1 | 0 | (69) |
|---|---|------|

\* Have you ever had a severe chest pain across the front of your chest lasting for half an hour or more ?

|                                                                                                                                                                         |            |           |                   |
|-------------------------------------------------------------------------------------------------------------------------------------------------------------------------|------------|-----------|-------------------|
| <b>Peripheral vascular disease</b>                                                                                                                                      | <b>Yes</b> | <b>No</b> |                   |
| * Pain in the calf during walking which is relieved by stopping?                                                                                                        | 1          | 0         | (70)              |
| <b>Stroke/TIA</b>                                                                                                                                                       | <b>Yes</b> | <b>No</b> |                   |
| * Have you ever had any of the following: difficulty in talking, weakness of arm and/ or leg on one side of the body or numbness on one side of the body?               | 1          | 0         | (71)              |
| <b>Neurological Symptoms (Diabetic Neuropathy Symptom Score)</b>                                                                                                        | <b>Yes</b> | <b>No</b> |                   |
| * Are you suffering from unsteadiness in walking?<br>(need for visual control, increase in the dark, walk like a drunk man, lack of contact with floor)                 | 1          | 0         | (72)              |
| * Do you have a burning, aching pain or tenderness at your legs or feet?<br>(occurring at rest or at night, not related to exercise, exclude intermittent claudication) | 1          | 0         | (73)              |
| * Do you have prickling sensations at your feet or legs?<br>(occurring at rest or at night, distal>proximal, stocking distribution)                                     | 1          | 0         | (74)              |
| * Do you have places of numbness in your feet or legs?                                                                                                                  | 1          | 0         | (75)              |
| * Have you had non-healing ulcers?                                                                                                                                      | 1          | 0         | (76)              |
| * Are you sexually active?                                                                                                                                              | 1          | 0         | (77)              |
| * Do you have any sexual problems?                                                                                                                                      | 1          | 0         | (78)              |
| If yes, check the correct answer                                                                                                                                        | <b>Yes</b> | <b>No</b> |                   |
| Lack of desire                                                                                                                                                          | 1          | 0         | (79)              |
| Impotence(males only)/ reduced lubrication (females)                                                                                                                    | 1          | 0         | (80)              |
| Lack or delay of ejaculation/ lack or delay of orgasm in females                                                                                                        | 1          | 0         | (81)              |
| Pain during intercourse                                                                                                                                                 | 1          | 0         | (82)              |
| Other:.....                                                                                                                                                             | 1          | 0         | (83)              |
| <b>Family history of diabetes:</b>                                                                                                                                      | <b>Yes</b> | <b>No</b> |                   |
| Have anyone in your immediate family ever had “ Diabetes”?                                                                                                              | 1          | 0         | (84)              |
| Indicate the diabetic status of the following relatives :                                                                                                               | <b>Yes</b> | <b>No</b> | <b>Don't know</b> |
| Father                                                                                                                                                                  | 1          | 0         | 2 (85)            |
| Mother                                                                                                                                                                  | 1          | 0         | 2 (86)            |
| Maternal grand mother                                                                                                                                                   | 1          | 0         | 2 (87)            |
| Maternal grand father                                                                                                                                                   | 1          | 0         | 2 (88)            |
| Paternal grand mother                                                                                                                                                   | 1          | 0         | 2 (89)            |
| Paternal grand father                                                                                                                                                   | 1          | 0         | 2 (90)            |
| Age of onset of diabetes in father                                                                                                                                      | [ ]        | [ ]       | (91)              |
| Age of onset of diabetes in mother                                                                                                                                      | [ ]        | [ ]       | (92)              |
| Total number of male siblings                                                                                                                                           | [ ]        | [ ]       | (93)              |
| Number of male siblings with diabetes                                                                                                                                   | [ ]        | [ ]       | (94)              |
| Average age of onset of brothers                                                                                                                                        | [ ]        | [ ]       | (95)              |
| Total no of female siblings                                                                                                                                             | [ ]        | [ ]       | (96)              |
| Number of female siblings with diabetes                                                                                                                                 | [ ]        | [ ]       | (97)              |
| Average age of onset of sisters                                                                                                                                         | [ ]        | [ ]       | (98)              |
| Total number of male children                                                                                                                                           | [ ]        | [ ]       | (99)              |
| Number of male children with diabetes                                                                                                                                   | [ ]        | [ ]       | (100)             |
| Average age of onset in sons                                                                                                                                            | [ ]        | [ ]       | (101)             |
| Total no of female children                                                                                                                                             | [ ]        | [ ]       | (102)             |
| Number of female children with diabetes                                                                                                                                 | [ ]        | [ ]       | (103)             |
| Average age of onset in daughters                                                                                                                                       | [ ]        | [ ]       | (104)             |

**Family history of hypertension:**

Has anyone in your immediate family ever had “hypertension”?

| Yes | No |       |
|-----|----|-------|
| 1   | 0  | (105) |

Indicate the hypertension status of the following relatives :

| Yes           | No | Don't know |         |
|---------------|----|------------|---------|
| Parents       | 1  | 0          | 2 (106) |
| Siblings      | 1  | 0          | 2 (107) |
| Grand parents | 1  | 0          | 2 (108) |
| Children      | 1  | 0          | 2 (109) |

**Family history of ischaemic heart diseases:**

Has anyone in your family ever had “ischaemic heart diseases”?

| Yes | No |       |
|-----|----|-------|
| 1   | 0  | (110) |

Indicate the history of IHD of the following relatives :

| Yes           | No | Don't know |         |
|---------------|----|------------|---------|
| Parents       | 1  | 0          | 2 (111) |
| Siblings      | 1  | 0          | 2 (112) |
| Grand parents | 1  | 0          | 2 (113) |
| Children      | 1  | 0          | 2 (114) |

**Family history of strokes:**

Has anyone in your family ever had “strokes”?

| Yes | No |       |
|-----|----|-------|
| 1   | 0  | (115) |

Indicate the history of stroke of the following relatives :

| Yes           | No | Don't know |         |
|---------------|----|------------|---------|
| Parents       | 1  | 0          | 2 (116) |
| Siblings      | 1  | 0          | 2 (117) |
| Grand parents | 1  | 0          | 2 (118) |
| Children      | 1  | 0          | 2 (119) |

**Measure blood pressure - 2nd reading**

**EXAMINATION & INVESTIGATIONS**

|                                                      |  |                 |       |
|------------------------------------------------------|--|-----------------|-------|
| Height (cm) : .....                                  |  | [ ][ ]          | (120) |
| Weight (Kg) : .....                                  |  | [ ][ ] • [ ][ ] | (121) |
| BMI ( calculate later ) : .....                      |  | [ ][ ] • [ ][ ] | (122) |
| Waist circumference – cm : .....                     |  | [ ][ ][ ]       | (123) |
| Hip circumference – cm : .....                       |  | [ ][ ][ ]       | (124) |
| Waist - Hip ratio : .....                            |  | [ ] • [ ][ ]    | (125) |
| Distance from xyphisternum to umbilicus (cm) : ..... |  | [ ][ ]          | (126) |

|                               |  |                       |                     |       |
|-------------------------------|--|-----------------------|---------------------|-------|
| Blood Pressure (mmHg)         |  | Systole               | Diastole            |       |
| First reading                 |  | [ ][ ][ ] / [ ][ ][ ] | [ ][ ][ ] [ ][ ][ ] | (127) |
| Second reading (10 min later) |  | [ ][ ][ ] / [ ][ ][ ] | [ ][ ][ ] [ ][ ][ ] | (128) |

|                        |  |     |    |       |
|------------------------|--|-----|----|-------|
| Acanthosis nigricans : |  | Yes | No |       |
|                        |  | 1   | 0  | (129) |

|             |        |   |   |       |
|-------------|--------|---|---|-------|
| Foot ulcers |        |   |   |       |
|             | Active |   |   |       |
|             | Healed |   |   |       |
|             | None   |   |   |       |
|             |        | 1 | 2 | (130) |
|             |        | 0 |   |       |

|              |  |     |    |       |
|--------------|--|-----|----|-------|
| Lipoatrophy: |  | Yes | No |       |
|              |  | 1   | 0  | (131) |

|                            |  |     |    |       |
|----------------------------|--|-----|----|-------|
| Features of                |  | Yes | No |       |
| * Hirsutism (females only) |  | 1   | 0  | (132) |
| * Dysmorphism              |  | 1   | 0  | (133) |
| * Acromegaly               |  | 1   | 0  | (134) |
| * Cushings syndrome        |  | 1   | 0  | (135) |
| * Hyperthyroidism          |  | 1   | 0  | (136) |

**\*Any patient with these features needs to be shown to the PI**

**To be filled when laboratory tests are available**

|                                                        |  |                 |  |       |
|--------------------------------------------------------|--|-----------------|--|-------|
| Fasting blood glucose level at this visit - mg/dl      |  | [ ][ ][ ]       |  | (137) |
| 2 hour post glucose blood glucose at this visit- mg/dl |  | [ ][ ][ ]       |  | (138) |
| Lipid profile - mmol/l                                 |  |                 |  |       |
| Total cholesterol                                      |  | [ ][ ] • [ ][ ] |  | (139) |
| HDL cholesterol                                        |  | [ ][ ] • [ ][ ] |  | (140) |
| LDL cholesterol                                        |  | [ ][ ] • [ ][ ] |  | (141) |
| Triglycerides                                          |  | [ ][ ] • [ ][ ] |  | (142) |



ALT (iu/L)

AST (iu/L)

|  |  |  |
|--|--|--|
|  |  |  |
|  |  |  |

(143)

(144)

ECG      Normal  
           Ischaemic changes present  
           Specify ischaemic changes

1

2

3

(145)

LVH present(voltage criteria) .....

Yes

No

1

0

(146)

Data completed:

1. History

2. Anthropometry

3. Fasting blood samples

4. Post glucose load blood sample

5. ECG

.....  
 Signature:

**To be completed by the Principal Investigator Before data entry**

Completion of the questionnaire satisfactory

Yes 1   
 No 2

.....  
 Signature of the Principal Investigator
